# Supplementary material for: Dynamics of rumen bacterial composition of yak (Bos grunniens) in response to dietary supplements during the cold season
Source: PeerJ. 2021 Jun 18;9:e11520. doi: 10.7717/peerj.11520 (PMC8216167; doi:10.7717/peerj.11520)
Supplement: Supplemental Information 3 — GG, grazing group; OG, oats hay supplement group; CG, concentrate supplement group. [file peerj-09-11520-s003.xlsx]

## Sheet: Sheet1
Groups	Rumen pH	NH3-N (mg/mL)	TVFA (mM)	Acetate (%)	Propionate (%)	Butyrate (%)	isobutyrate (%)	isovalerate (%)	A/P
GG1	7.04	5.6	53.212	79.0816	15.6	4.11943	0.847712	0.866509	5.06659
GG2	7.01	7	51.834	82.2323	14.08	4.02288	0.841683	0.936275	5.84034
GG3	7	5.45	52.462	80.0158	16.85	4.58752	0.874919	0.901605	4.74766
GG4	7.04	5.6	51.174	72.9068	14.33	4.60695	0.862103	0.924659	5.08673
GG5	7.03	5.59	53.494	79.9805	16.2	6.05058	0.83218	0.895762	4.93517
GG6	7.03	5.6	52.416	77.8919	14.19	5.879	0.851178	0.881713	5.48794
GG7	7.04	6.2	52.4312	79.666	15.45	4.87473	0.864254	0.900821	5.15327
OG1	6.98	8.64	58.1824	76.9928	16.95	5.63405	0.912648	0.964855	4.54115
OG2	6.99	8.76	58.2657	77.0063	16.95	5.7746	0.906194	0.974312	4.54115
OG3	6.84	8.64	59.1619	76.1162	15.17	5.19502	0.829926	0.914271	5.01751
OG4	6.94	8.66	55.511	77.1905	14.72	5.51872	0.958369	1.07907	5.24088
OG5	6.95	8.34	62.072	76.6818	15.92	6.51609	0.887679	0.839362	4.81531
OG6	6.93	8.64	63.337	77.0268	15.7441	4.97099	0.781534	0.808374	4.89243
OG7	6.76	8.6	59.3151	76.8414	15.8604	5.44413	0.880496	0.948831	4.84485
CG1	6.77	8.66	61.0505	70.2926	17.0713	5.38438	0.969689	1.40621	4.11759
CG2	6.78	11.58	62.6583	73.6682	18.733	5.53511	0.946084	1.34938	3.93254
CG3	6.75	11	65.3507	76.563	18.6427	8.5034	0.94002	1.08094	4.10686
CG4	6.76	11.32	64.0941	77.8226	16.2979	7.28477	0.923642	1.12662	4.77502
CG5	6.77	11.58	65.5485	77.4064	18.2227	7.32766	0.977902	1.27768	4.2478
CG6	6.76	11.58	63.8915	74.1885	16.0268	7.20974	0.964917	1.32255	4.62902
CG7	6.76	10.99	63.7077	76.8	17.9265	7.06939	0.941336	1.18981	4.28415
